# Supplementary material for: Catalytic reduction of NO by CO molecules over Ni-doped graphene: a DFT investigation
Source: Royal Society of Chemistry journal article supplement (doi:10.1039/c7nj02436c), 2017-01-01

# “Supporting Information”

## Catalytic reduction of NO by CO molecule over Ni-doped graphene: A DFT investigation

**Mehdi D. Esrafil** \*, Nasibeh Saeidi

Laboratory of Theoretical Chemistry, Department of Chemistry, University of Maragheh, Maragheh, Iran

\* Corresponding author. **Phone:** (+98) 4212237955. **Fax:** (+98) 4212276060. **P.O. Box:** 5513864596. **E-mail:** [esrafil@maragheh.ac.ir](mailto:esrafil@maragheh.ac.ir) (Mehdi D. Esrafil).

**Figure S1.** Reaction pathway related to the of CO + NO reaction over Ni-graphene

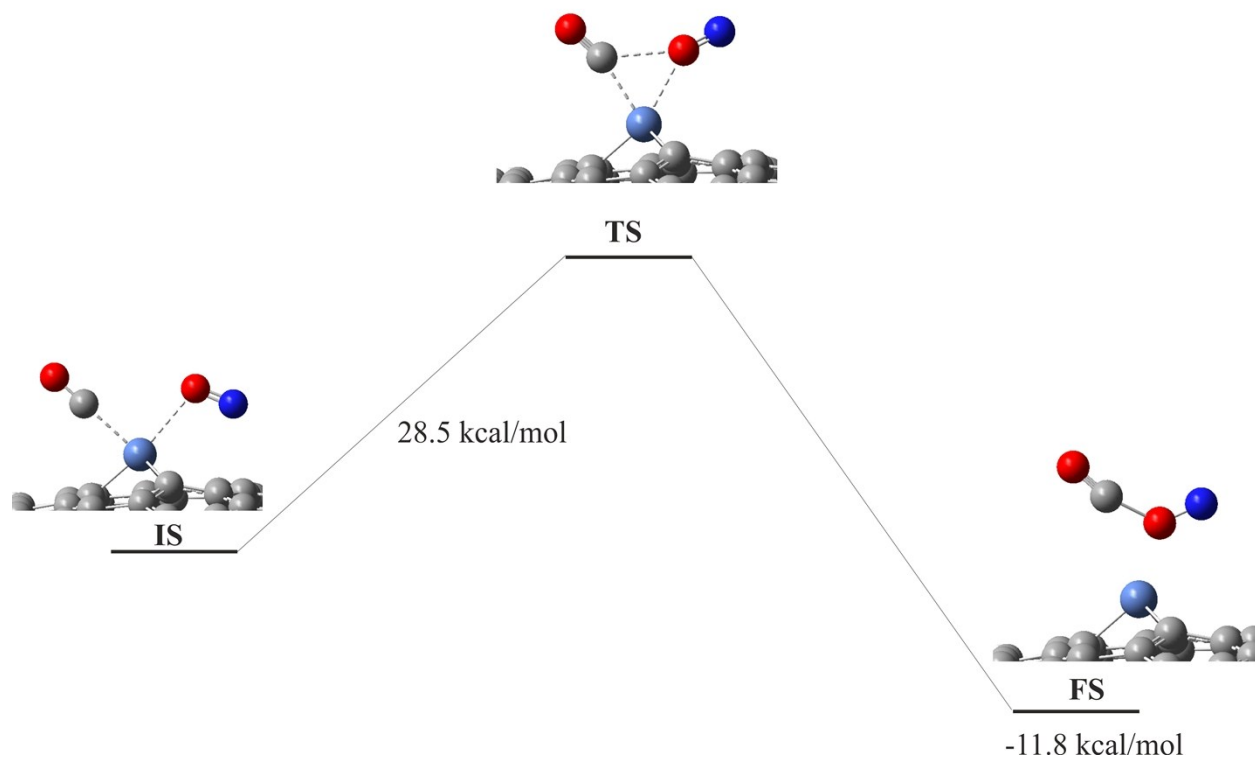

**Figure S2.** Reaction pathways of CO and NO decomposition over Ni-graphene

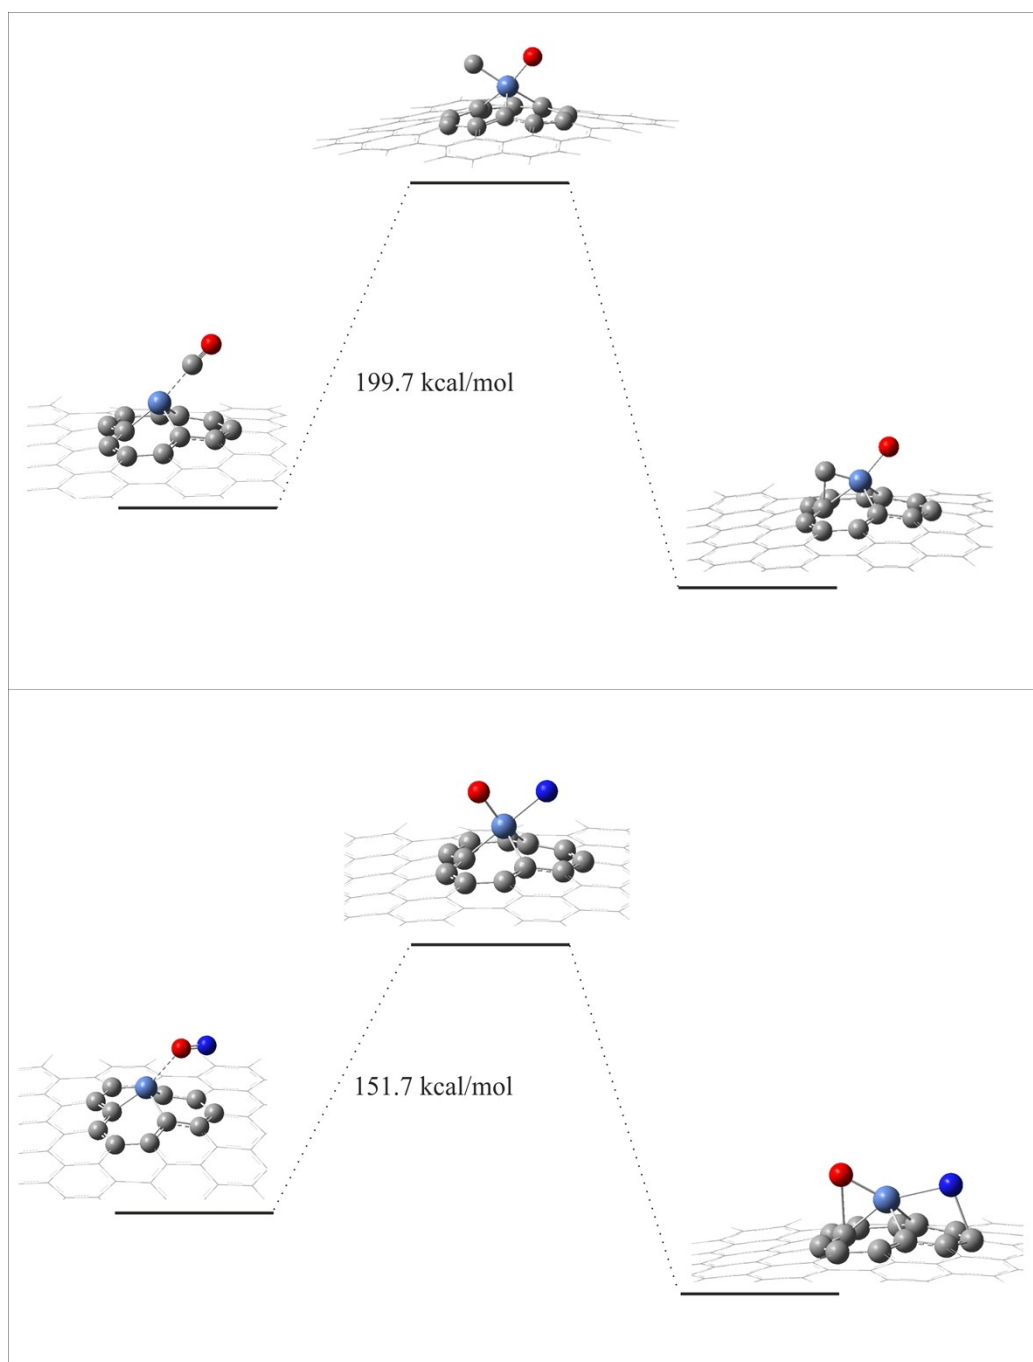

Supplement: c7nj02436c1.pdf [file c7nj02436c1.pdf]
